# Supplementary material for: Multiphasic dynamics of phosphatidylinositol 4-phosphate during phagocytosis
Source: PubMed Central journal article supplement — Mol Biol Cell. 2017 Jan 1;28(1):128–40. doi: 10.1091/mbc.E16-06-0451 (PMC5221617; doi:10.1091/mbc.e16-06-0451), 2017-01-01

# Supplemental Materials

*Molecular Biology of the Cell*

Levin et al.

## SUPPLEMENTARY FIGURES

Figure S1. **2xP4M expression does not affect Golgi morphology.** **A)** Representative confocal micrograph of a RAW264.7 cell co-expressing the PtdIns4P-biosensor GFP-2xP4M and the Golgi-marker mCh-sialyltransferase. Main panel shows mCh-sialyltransferase fluorescence; the cell outline is drawn in yellow. Bottom left inset shows GFP-2xP4M fluorescence. **B)** Representative confocal micrograph of a RAW cell expressing only the Golgi-marker mCh-sialyltransferase. Top right insets show magnifications of the corresponding dotted white boxes. Scale bars = 5  $\mu$ m.

Figure S2. **Phosphoinositide metabolism during the early phagocytic stages.** **A)** Time-lapse gallery of confocal micrographs of RAW264.7 cells transiently co-expressing mCh-2xP4M and GFP-PH-Gab2 [a PtdIns(3,4,5)P<sub>3</sub>-specific biosensor] during phagocytosis of IgG-SRBCs. The Roman numerals refer to the stages defined on Figure 3. Images are representative of at least 10 similar determinations. **B)** Schematic diagram illustrating possible enzymatic reactions whereby phagosomes can be depleted of PtdIns4P. **C)** Confocal micrographs of RAW264.7 cells co-expressing GFP-PH-TAPP1 [a PtdIns(3,4)P<sub>2</sub> biosensor] and mCh-2xP4M during the phases of initial increase (left) and disappearance of PtdIns4P (right); PtdIns(3,4)P<sub>2</sub> was not detected in phagosomes during PtdIns4P disappearance. **D)** Confocal micrographs acquired during phagocytosis of 1.6  $\mu$ m TMR-IgG-coated latex beads by LY294002-treated (50  $\mu$ M) RAW264.7 cells expressing GFP-2xP4M. Representative images of the phases of initial PtdIns4P increase (left) and its subsequent disappearance (right) are shown. LY294002 did not prevent PtdIns4P disappearance. Insets show magnifications of dotted white boxes. **E)** RAW264.7 cells were challenged with 3.87  $\mu$ m IgG-coated latex beads. After 15 min, cells were washed and fixed, permeabilized and immunostained using anti-PI4KA antibodies. Confocal sections are shown. A forming phagosome is indicated with a yellow arrow while a maturing phagosome is indicated with a white arrow. Images are representative of at least 10 similar determinations. Scale bars = 5  $\mu$ m.

Figure S3. **PtdIns4P dynamics in COS-1-Fc $\gamma$ RIIa cells.** **A)** Time-lapse gallery of confocal micrographs acquired during phagocytosis of TAMRA-labeled IgG-opsonized sheep red blood cells (IgG-SRBCs; shown in red) by COS-1-Fc $\gamma$ RIIa cells transiently expressing GFP-2xP4M (green). The panels indicate the time elapsed from the moment the target was engaged. Insets show magnifications of the area delimited by dotted white boxes. **B)** Summary of the changes in PtdIns4P content of phagosomes following engagement of IgG-SRBCs. The intensity of GFP-2xP4M in phagosomes was quantified and normalized to that of the plasmalemma. The three phases defined in RAW264.7 cells were recapitulated in COS-1-Fc $\gamma$ RIIa cells, with slower dynamics. Data are expressed relative to the maximum value attained during the initial transient increase, which was defined as time "0". Values are means  $\pm$  SEM of 4 independent experiments. Scale bars = 5  $\mu$ m.

Figure S4. **Cresyl violet co-localizes with GFP-Rab7, but not with Rab5.** **A)** Representative confocal section of RAW264.7 cells transiently expressing GFP-Rab5 and treated with cresyl violet (1  $\mu$ M for 2 min; shown in red). **B)** Single confocal section of

RAW264.7 cells transiently expressing GFP-Rab7 treated with cresyl violet as above. Insets show magnifications of dotted white boxes for each channel. Scale bars = 5  $\mu$ m.

Figure S5. **Diagrammatic representation of the changes undergone by phosphoinositides during phagosome formation and maturation.** The changes in PtdIns4P (shades of blue) are compared with those undergone by PtdIns(4,5)P<sub>2</sub> (green), PtdIns(3,4,5)P<sub>3</sub> (red) and PtdIns3P (purple). Phagosome formation is divided into receptor engagement, pseudopod extension and vacuole sealing stages, while maturation is divided into early and late/lysosomal stages.

**A**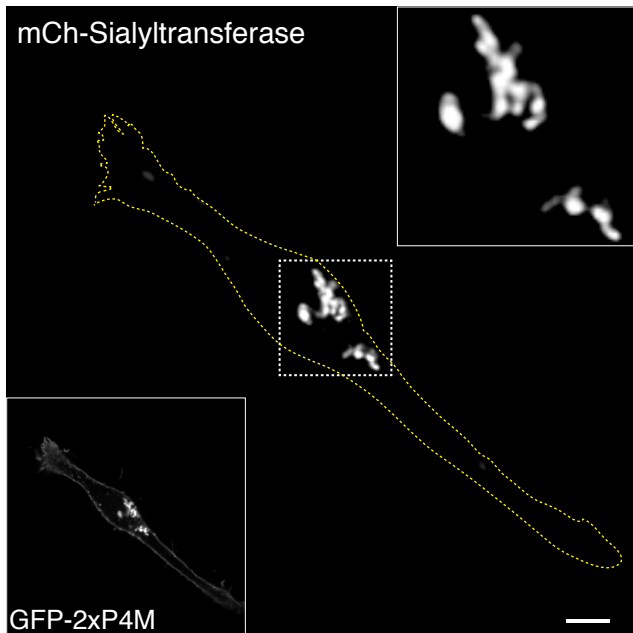**B**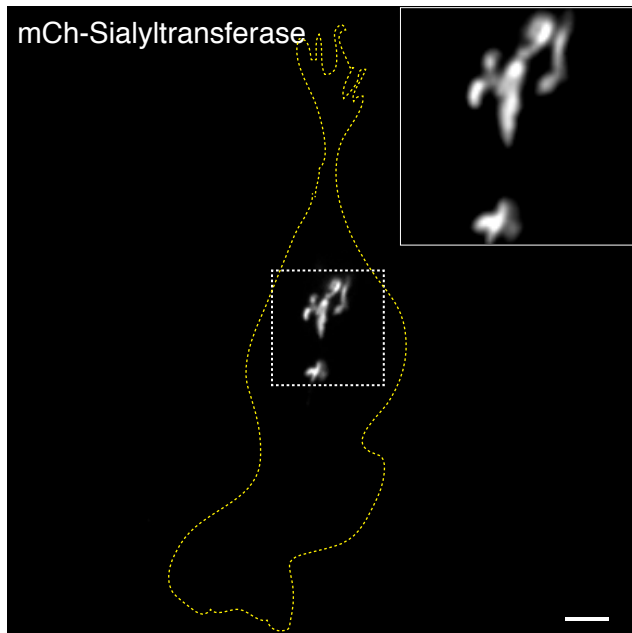

**A**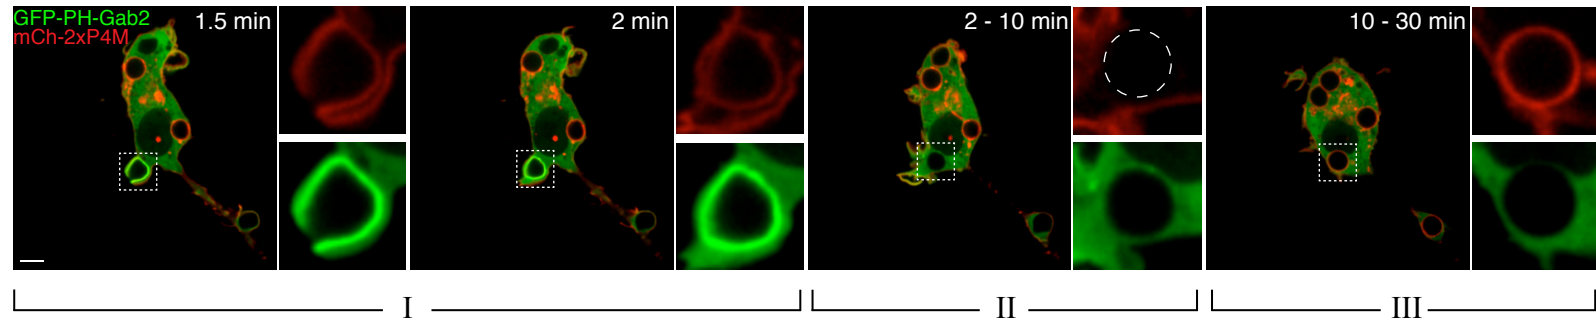**B**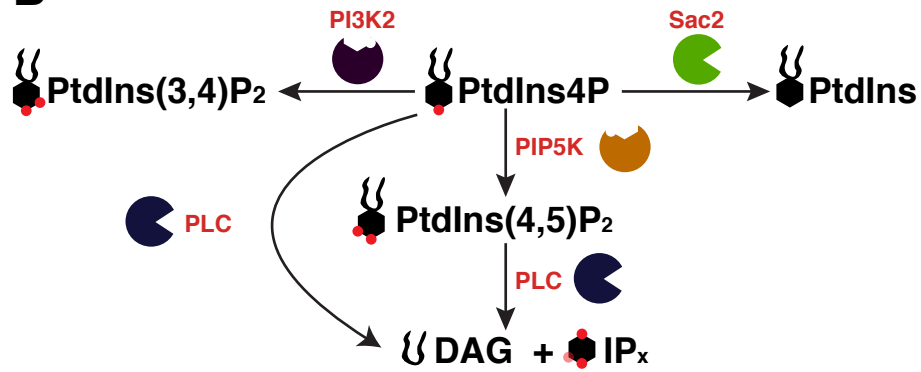**C**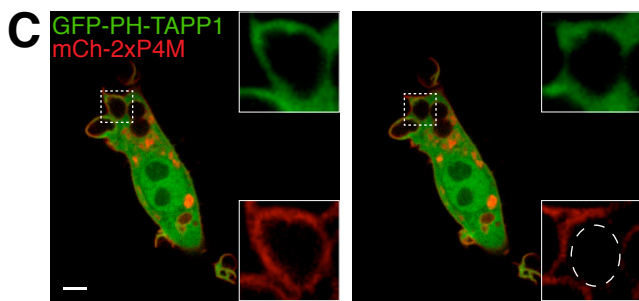**D**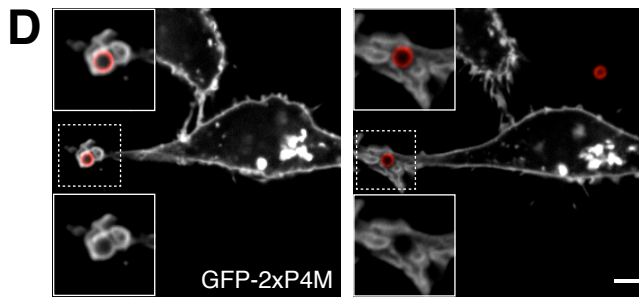

LY294002

**E**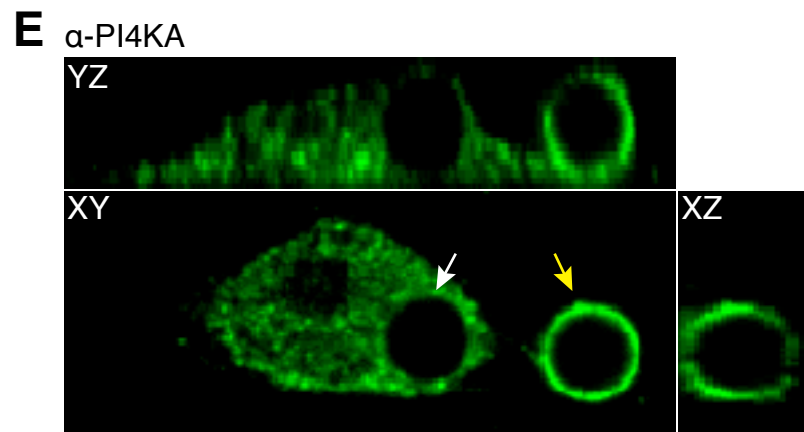

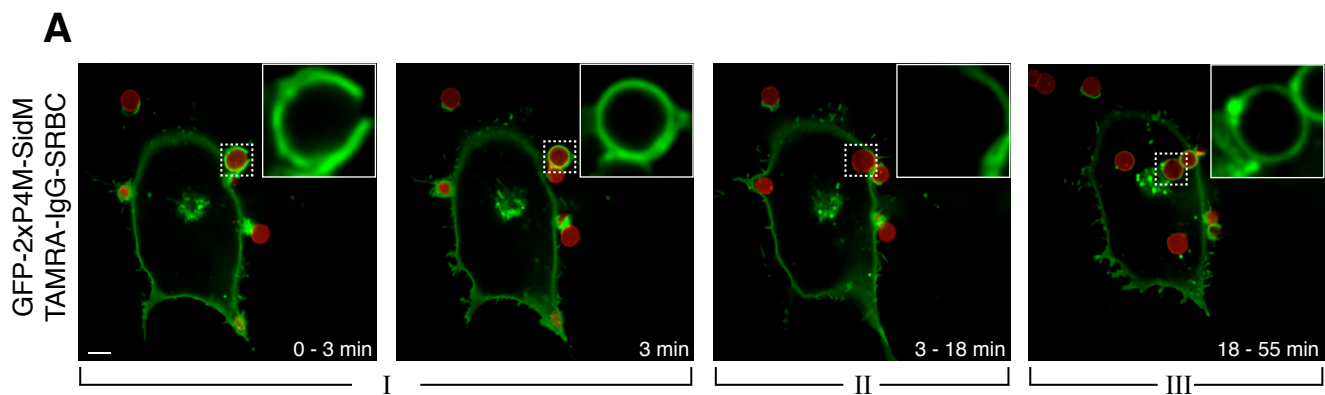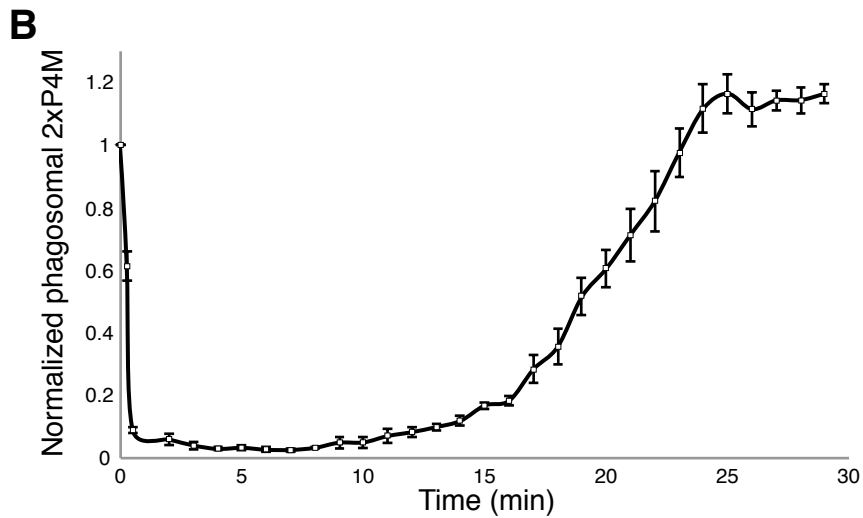

**A**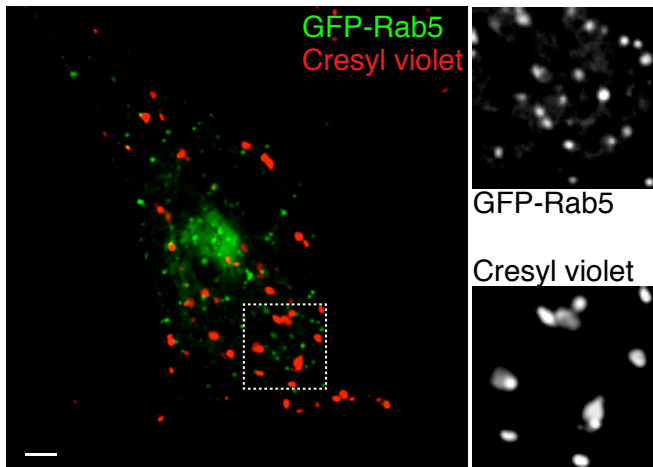**B**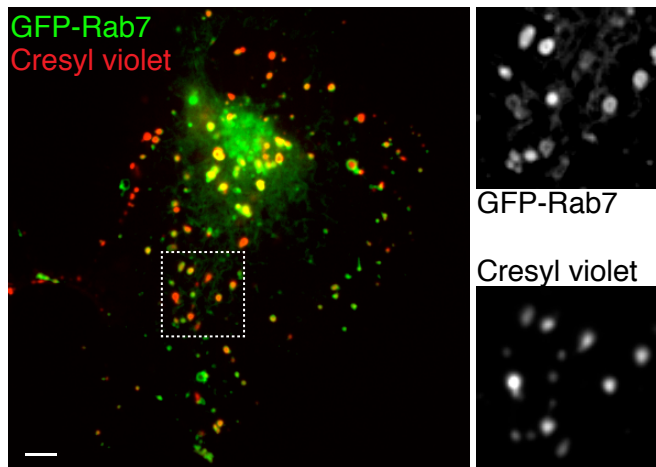

Phagosome formation

Phagosome maturation

Engagement

Extension

Sealing

Early maturation

Late maturation /  
phagolysosome

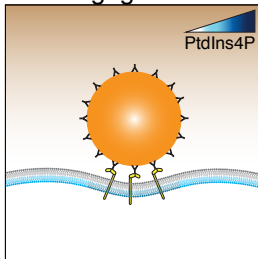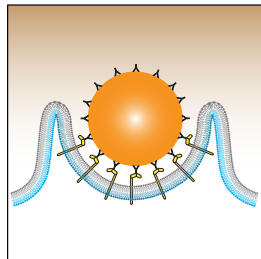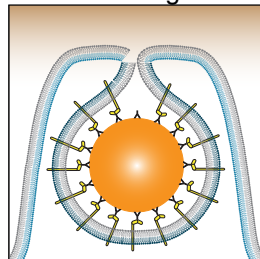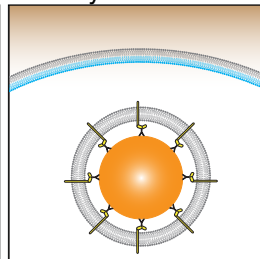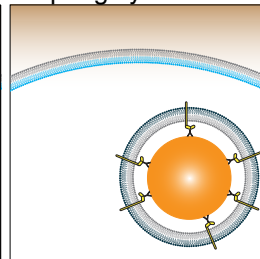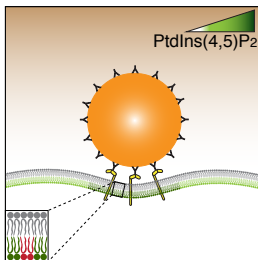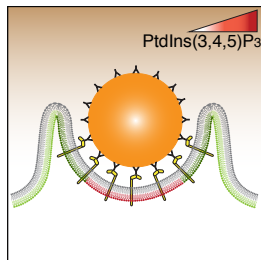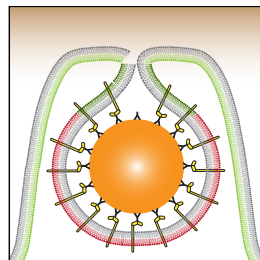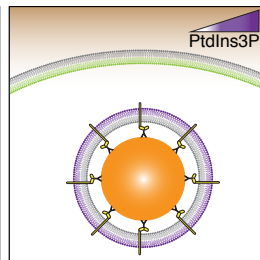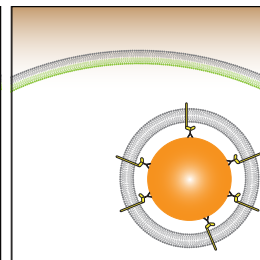

Supplement: supp_E16-06-0451v1_CombinedSupMats.pdf [file supp_E16-06-0451v1_CombinedSupMats.pdf]
